# Supplementary material for: Good Vibrations: Structural Remodeling of Maturing Yeast Pre-40S Ribosomal Particles Followed by Cryo-Electron Microscopy
Source: PubMed Central journal article supplement (PMC7179242; doi:10.3390/molecules25051125), 2020-03-03
Supplement: molecules-25-01125-s001.pdf [file molecules-25-01125-s001.pdf]

# Supplementary Figure 1

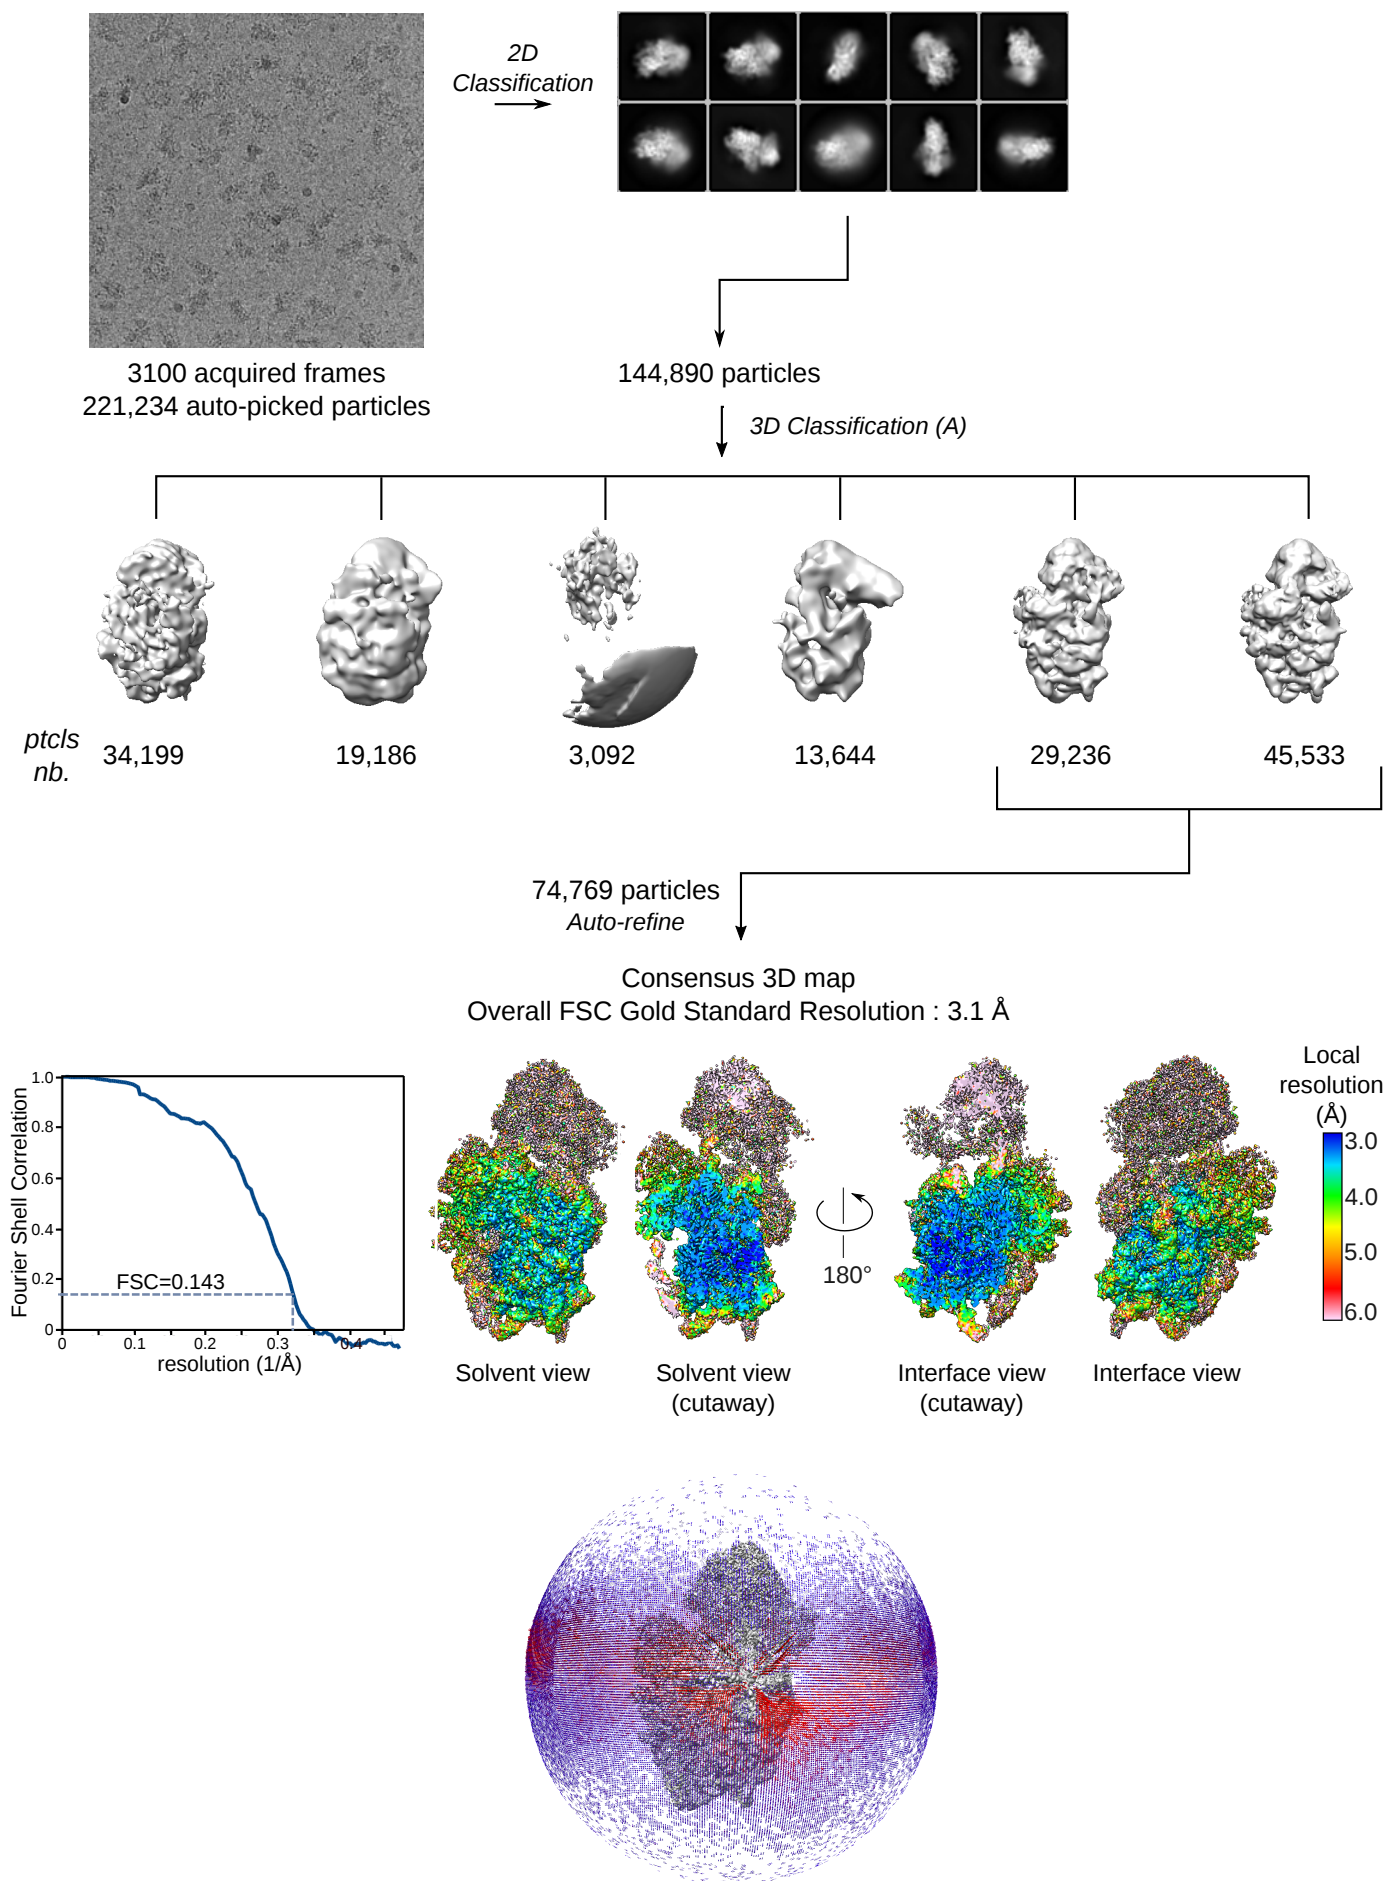

## Supplementary Figure 2

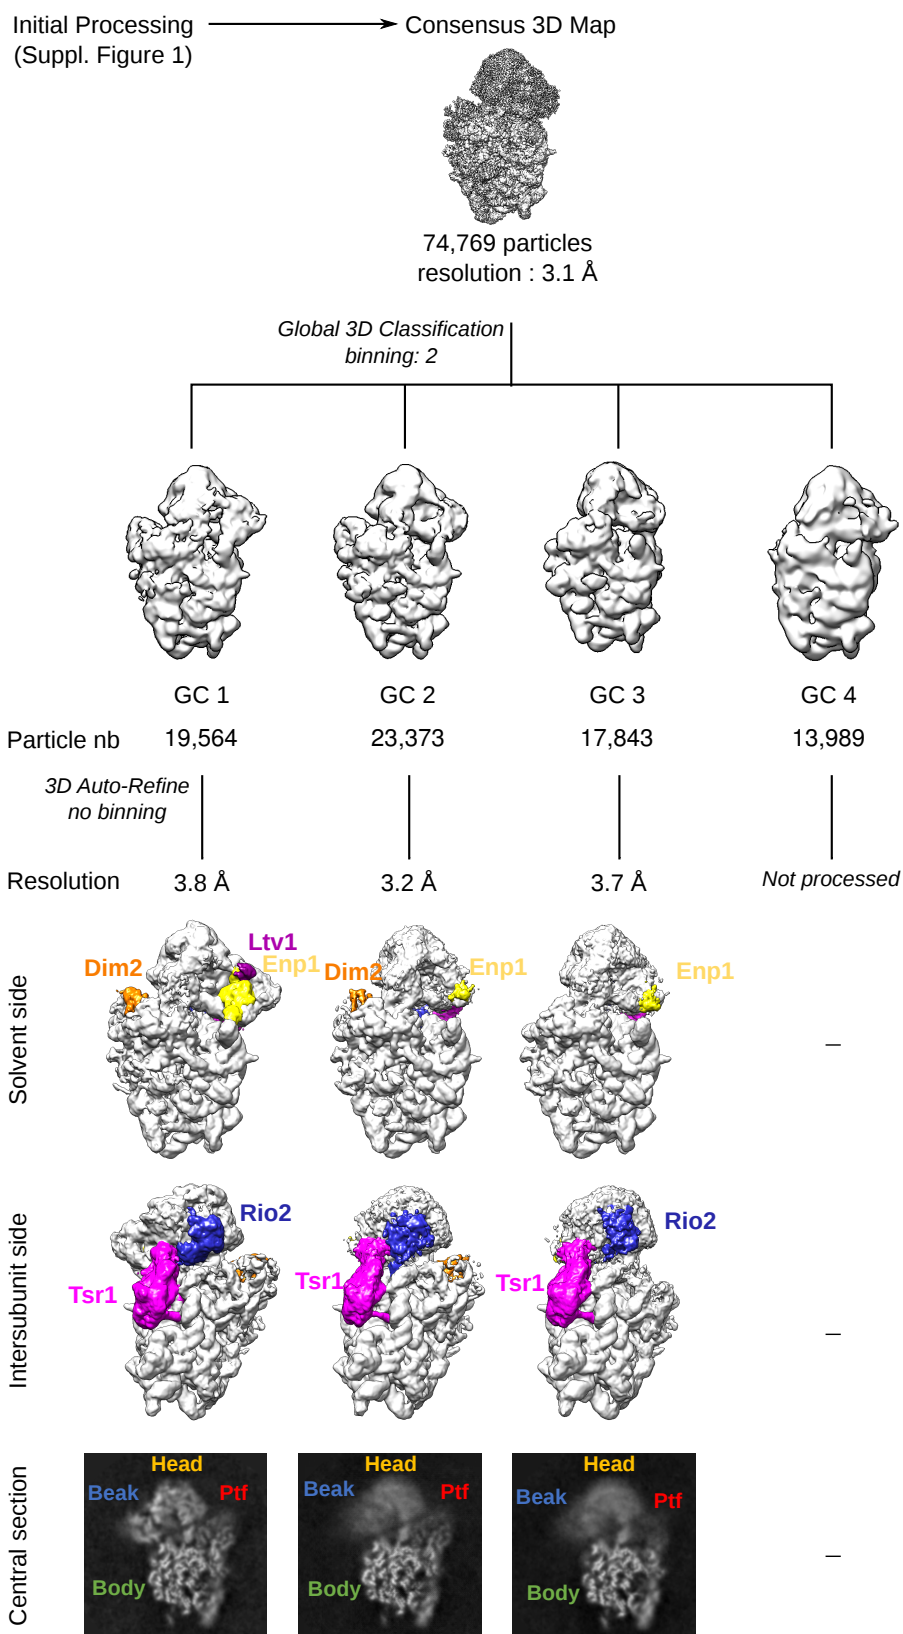

# Supplementary Figure 3

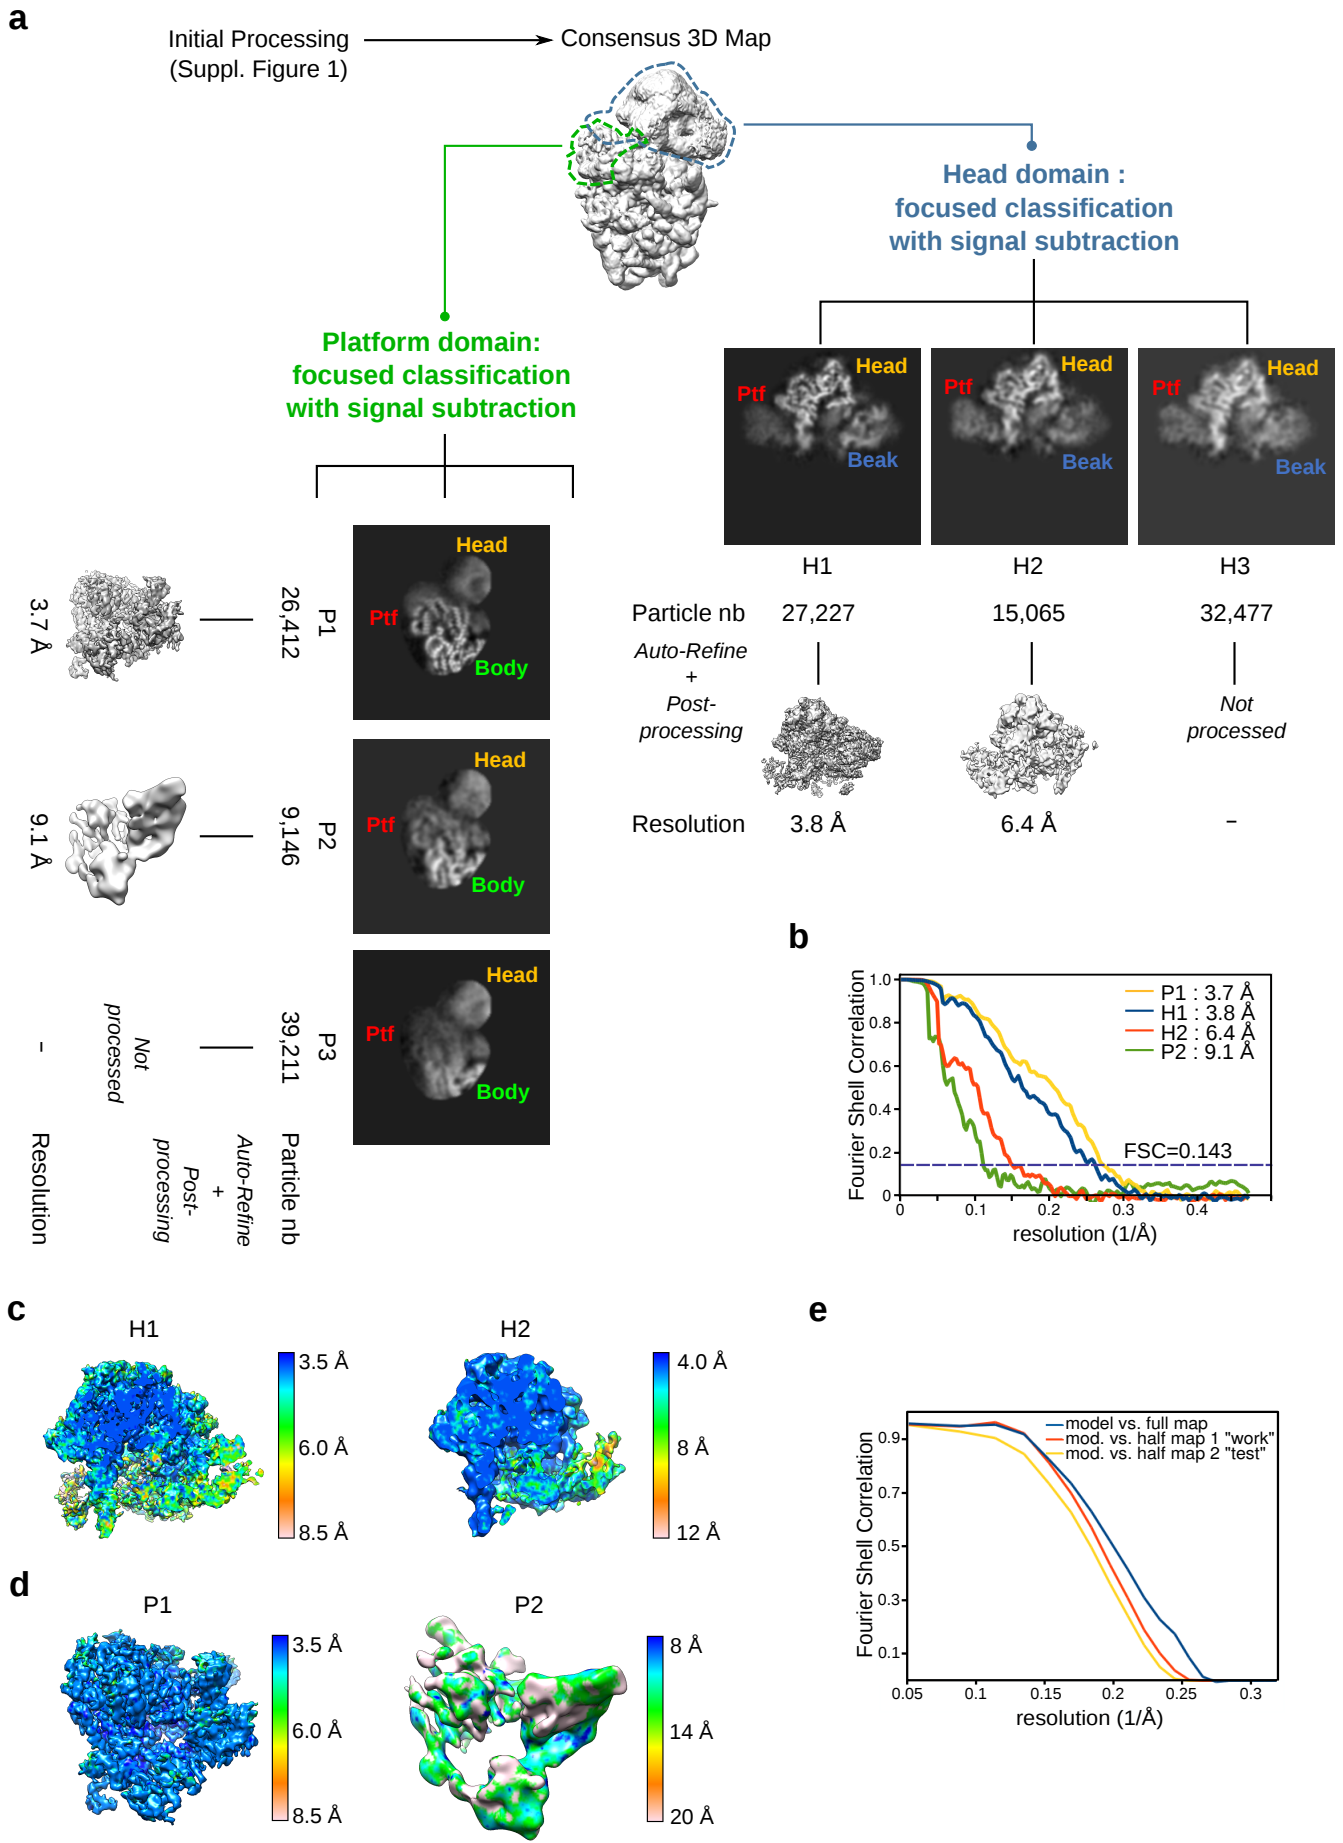

| <b>EM Data collection</b>                                       |                                                       |                    |              |             |             |             |             |
|-----------------------------------------------------------------|-------------------------------------------------------|--------------------|--------------|-------------|-------------|-------------|-------------|
| Microscope model                                                | FEI Titan Krios cryo-transmission electron microscope |                    |              |             |             |             |             |
| Detector model                                                  | Gatan K2 summit direct electron detector              |                    |              |             |             |             |             |
| Number of datasets                                              | 1                                                     |                    |              |             |             |             |             |
| Number of micrographs collected                                 | 3,100                                                 |                    |              |             |             |             |             |
| Pixel size (Å)                                                  | 1.067                                                 |                    |              |             |             |             |             |
| Defocus range (µm)                                              | 0.8– 2,8                                              |                    |              |             |             |             |             |
| Voltage (kV)                                                    | 300                                                   |                    |              |             |             |             |             |
| Electron dose (e <sup>-</sup> Å <sup>-2</sup> )                 | 29.4                                                  |                    |              |             |             |             |             |
| Name of 3D reconstruction / model                               | Early cytoplasmic Tsr1-FPZ                            | Consensus Tsr1-FPZ | GC1 Tsr1-FPZ | H1 Tsr1-FPZ | H2 Tsr1-FPZ | P1 Tsr1-FPZ | P2 Tsr1-FPZ |
| EMDB entry of map                                               |                                                       | EMD-10715          | EMD-10713    | EMD-10716   | EMD-10717   | EMD-10718   | EMD-10719   |
| PDB entry of the full model                                     | 6Y7C                                                  |                    |              |             |             |             |             |
| Final number of particles                                       |                                                       | 74,769             | 19,564       | 27,227      | 15,065      | 26,412      | 9,146       |
| Resolution (Å) (FSC threshold = 0.143)                          |                                                       | 3.12               | 3.80         | 3.84        | 6.40        | 3.69        | 9.14        |
| Map sharpening B-factor (Å <sup>2</sup> )                       |                                                       | -147               | -157         | -172        | -326        | -165        | -303        |
| <b>Refinement and model validation statistics<sup>(a)</sup></b> |                                                       |                    |              |             |             |             |             |
| Model refinement resolution range ( Å )                         | 20-3.2                                                |                    |              |             |             |             |             |
| Model resolution (Å) (FSC threshold = 0.143)                    | 3.9                                                   |                    |              |             |             |             |             |
| Clashscore (all atoms)                                          | 9.98                                                  |                    |              |             |             |             |             |
| MolProbity Score                                                | 2.17                                                  |                    |              |             |             |             |             |
| <b>Protein</b>                                                  |                                                       |                    |              |             |             |             |             |
| Rotamer outliers (%)                                            | 1.0                                                   |                    |              |             |             |             |             |
| Rmsd (bonds lengths, Å)                                         | 0.01                                                  |                    |              |             |             |             |             |
| Rmsd (angles, °)                                                | 1.18                                                  |                    |              |             |             |             |             |
| <b>Ramachandran plot (%)</b>                                    |                                                       |                    |              |             |             |             |             |
| favored                                                         | 85.36                                                 |                    |              |             |             |             |             |
| allowed                                                         | 14.32                                                 |                    |              |             |             |             |             |
| outliers                                                        | 0.32                                                  |                    |              |             |             |             |             |
| <b>RNA</b>                                                      |                                                       |                    |              |             |             |             |             |
| Correct sugar puckers (%)                                       | 98.4                                                  |                    |              |             |             |             |             |
| Good backbone conformation (%)                                  | 64.0                                                  |                    |              |             |             |             |             |

<sup>(a)</sup>Models were validated using MolProbity implemented in PHENIX.REFINE (Adams et al., 2010)

**Supplementary Table 1.** Cryo-EM data collection, atomic models refinement and validation statistics.
